# Supplementary material
Source: HighWire-hosted journal article supplement (https://cmajopen-stage.highwire.org/highwire/filestream/87924/field_highwire_adjunct_files/4/open-2021-0114-reviewer-comments.pdf)
Supplement: open-2021-0114-reviewer-comments.pdf [file open-2021-0114-reviewer-comments.pdf]

**Article details: 2021-0114**

**Title:** Identifying priorities for sport and physical activity research in Canada: an iterative priority-setting study

**Authors:** Mathieu Bélanger PhD, Julie Goguen Carpenter MSc, Catherine M. Sabiston PhD, Leigh M. Vanderloo PhD, Carolyn Trono, François Gallant MSc, Véronique Thibault MSc, Isabelle Doré PhD, Jennifer O'Loughlin PhD

**Reviewer 1:** Dr. Olufemi Ayeni

**Institution:** McMaster University

General comments (author response in bold)

Much needed, strong methods and well written. Bravo!

**Reviewer 2:** Dr. Sandy Wells

**Institution:** ThinkFirst Canada

General comments (author response in bold)

Thank you for the opportunity to read and comment on this paper. Overall, I found the process reported here to be a systematized and collaborative effort at identifying research priorities among sport and PA administrators/stakeholders. The methodology is collaborative and cross-sectoral. It also seems to improve the transparency of the research process for sport organizations, which may lead to better understanding and uptake of results.

At the same time, the research priorities seem weak in the face of public information regarding the current state of amateur sport culture in Canada.

1. The report seems to be lacking in details that could animate and explicate the research questions identified by this novel approach. For example, while the authors note a specific concern among stakeholders for PA participation among Indigenous communities, the rationale for this concern is not mentioned, nor is contextualizing information present for the other 7 priority research areas identified. This information could be crucial for the process of prioritization since the issues that currently plague sport – like dropout, unsafe cultures/spaces, the sexualization of girls/women, sexual abuse and bullying among boys and men, and participation rates of minoritized communities/identities – are issues of power dynamics.

**- We hope that the addition of details in the methods and results section, as requested by the editor, satisfies the concerns of this reviewer. (Pages 3 to 7)**

2. While the topics arrived at through this process can be studied from a range of perspectives and using a variety of methods, it seems important to emphasize that the priorities of the sport organizations may not capture the most important or transformative research questions – those that will lead to transformational (rather than sustainable) changes -- because of the bias toward conserving the present system.

Nevertheless, this report offers a welcome description of a collaborative and rigorous community-research partnership that will be useful for future PA workers in both the research and 'knowledge user' roles.

**- We added a limitation to state that “it is possible that participants identified priorities that are not transformative given a potential bias toward conserving the current systems and infrastructures.” (Page 8)**
